# Supplementary material for: Analysis of Genes with Alternatively Spliced Transcripts in the Leaf, Root, Panicle and Seed of Rice Using a Long Oligomer Microarray and RNA-Seq
Source: PubMed Central journal article supplement — Mol Cells. 2017 Oct 19;40(10):714–30. doi: 10.14348/molcells.2017.2297 (PMC5682249; doi:10.14348/molcells.2017.2297), 2017-10-19
Supplement: molce-40-10-714-supple1.pdf [file molce-40-10-714-supple1.pdf]

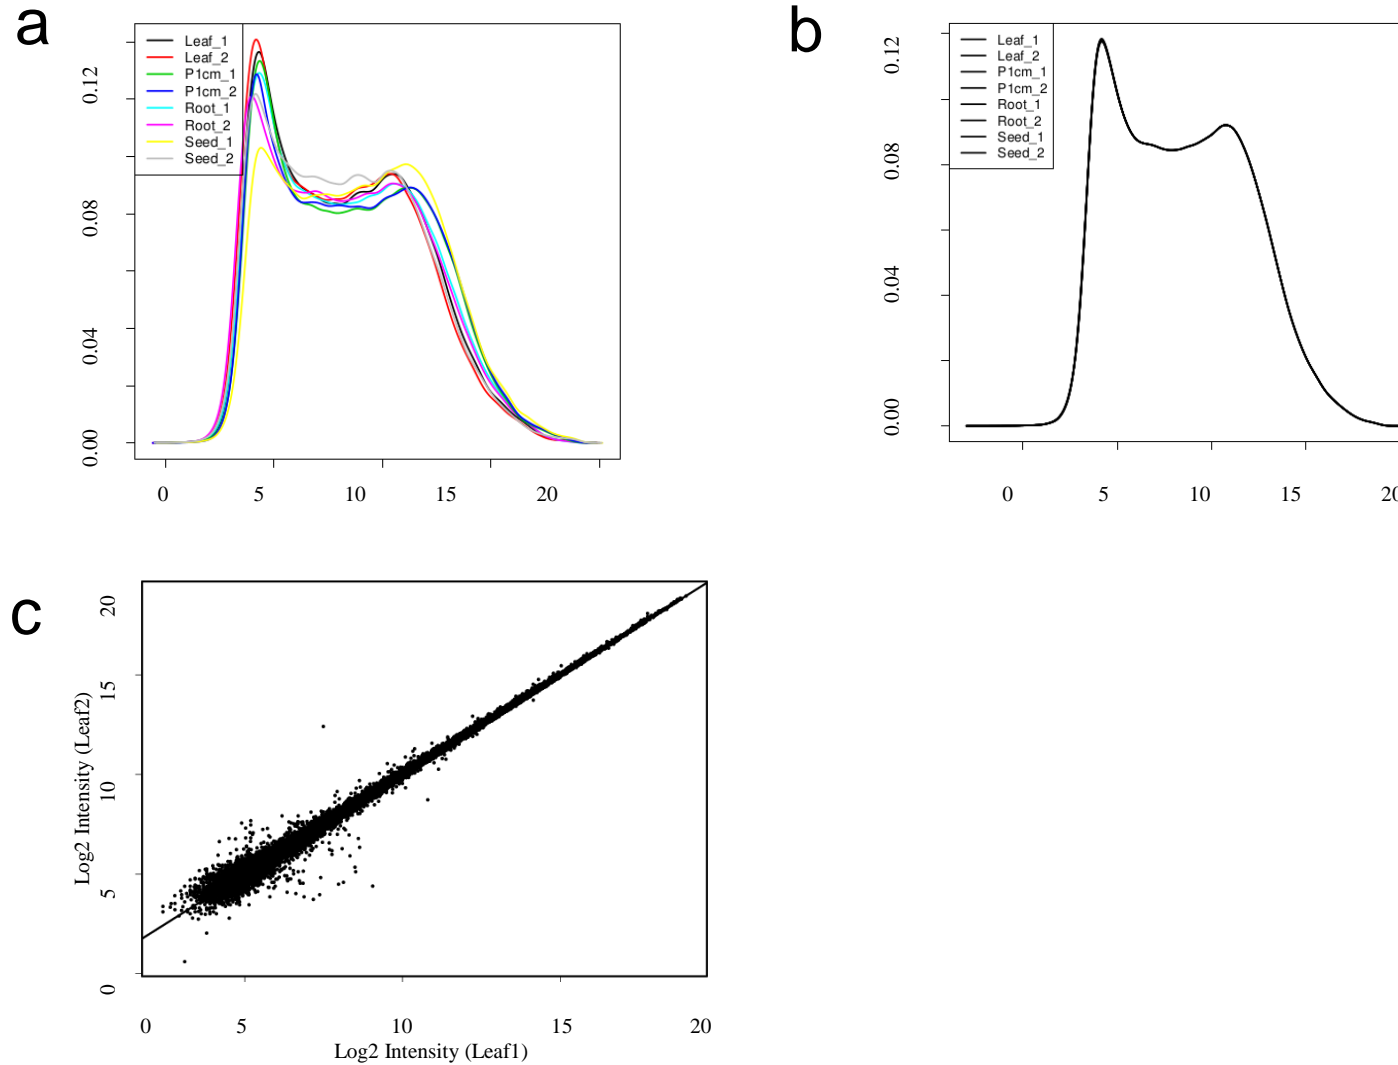

**Fig. S1. Signal distribution of the rice ASDM after background correction (a), normalization between slides (b) and a consistency test between microarrays (c).**

**a, b** The data were processed with limma package in R (<http://www.bioconductor.org/>) using backgroundCorrect and normalizeBetweenArrays functions, respectively. plotDensities functions were used to analyze the distribution of probe intensities from 8 microarray data. Frequency densities before and after normalization were plotted against log2-based intensities. **c** Log2-based intensities of 2 leaf samples were compared. The linear model was  $y=0.998x + 0.018$ ,  $r^2 = 0.996$ .

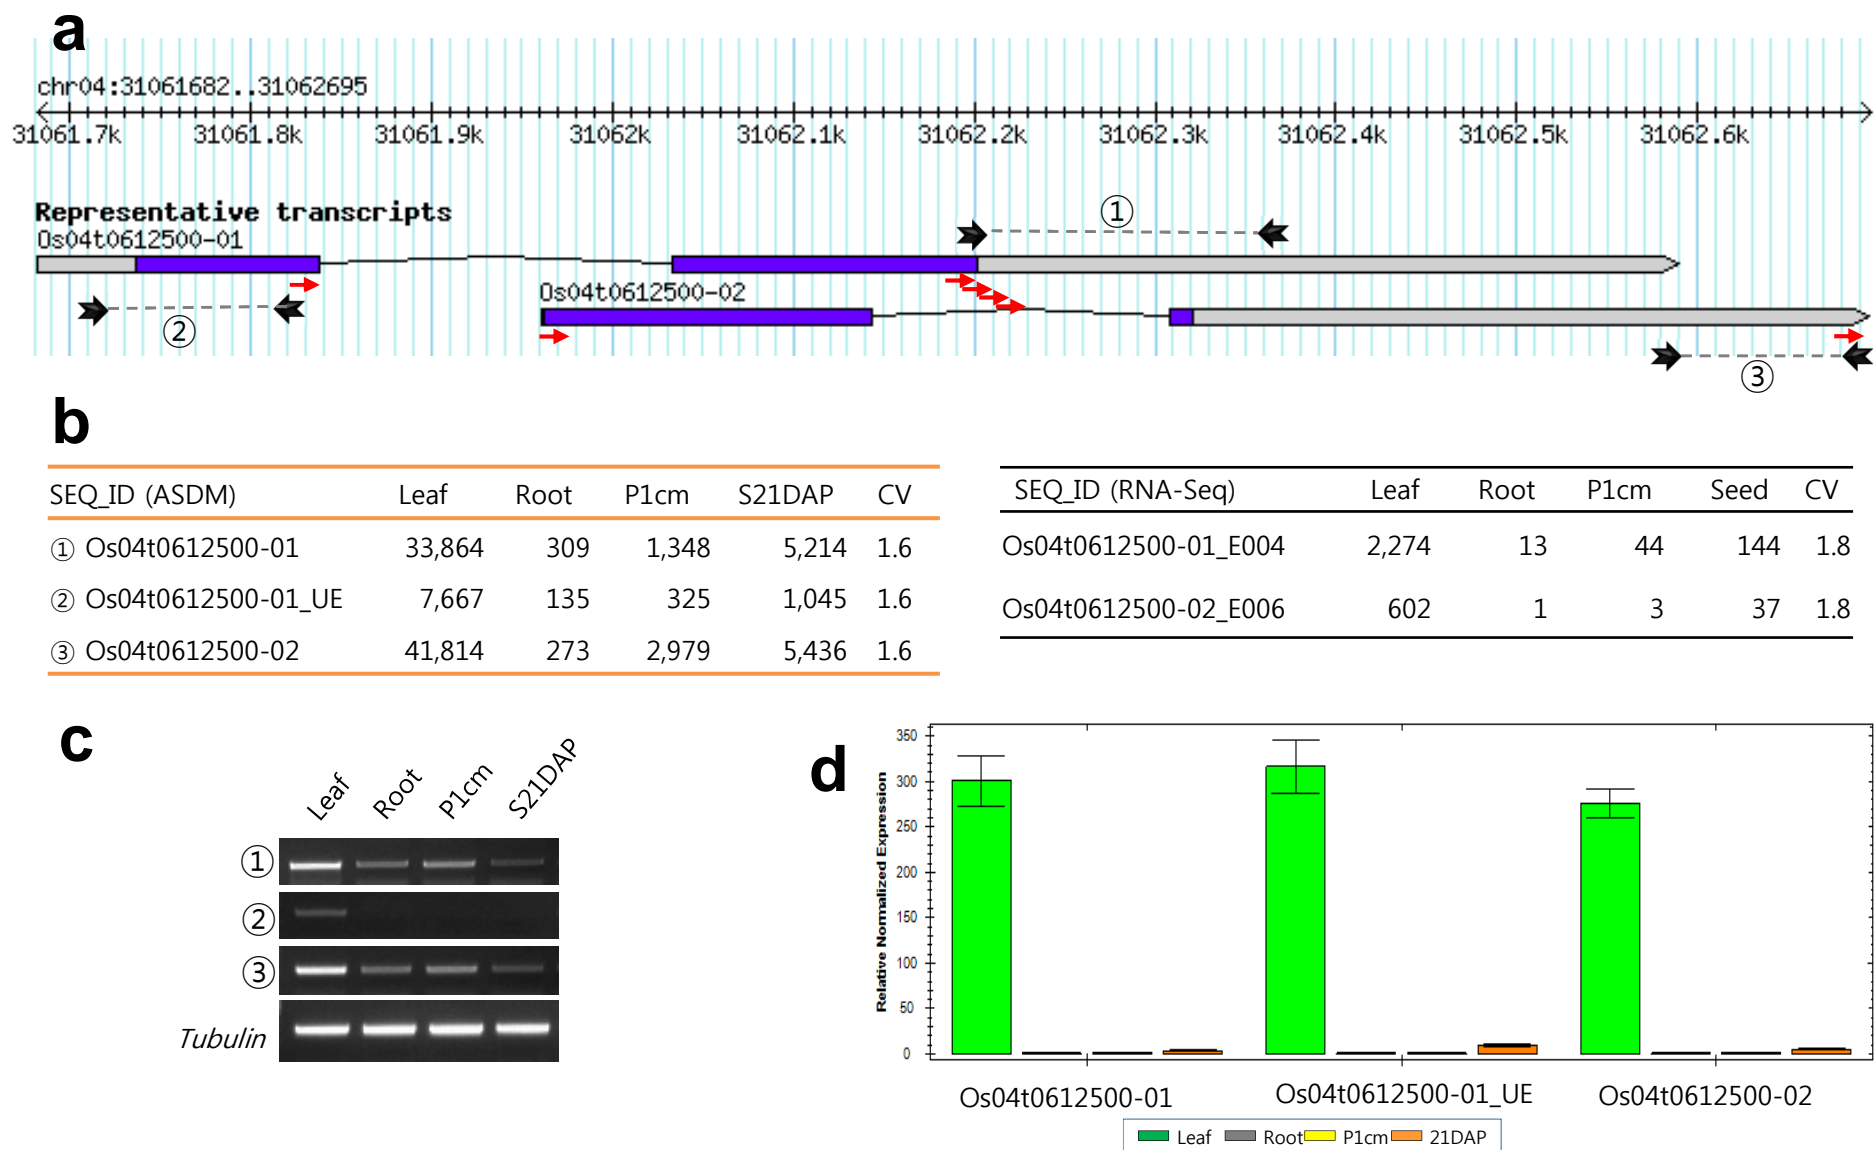

**Fig. S2A. The analysis of a locus, Os04g0612500, which has two transcripts, Os04t0612500-01 and Os04t0612500-02 (proline-rich proteins).**

**a** Design of feature probes in ASDM. Feature probes and primers for PCR were indicated as single arrows and thick arrows, respectively. UniQExonJ was indicated as arrow heads in Os04t0612500-01 in the junctions of two spliced exons. **b** Intensities in ASDM (left) and counts in RNA-Seq (right). Exons in RNA-Seq are designated as in Fig. 1B. **c** Analysis by RT-PCR and **d** quantitative real-time PCR. A locus, Os04g0612500, was highly expressed in the leaf. The rice *Tubulin* gene was used as a control. The expression of the lowest stage in each transcript was set to 1.

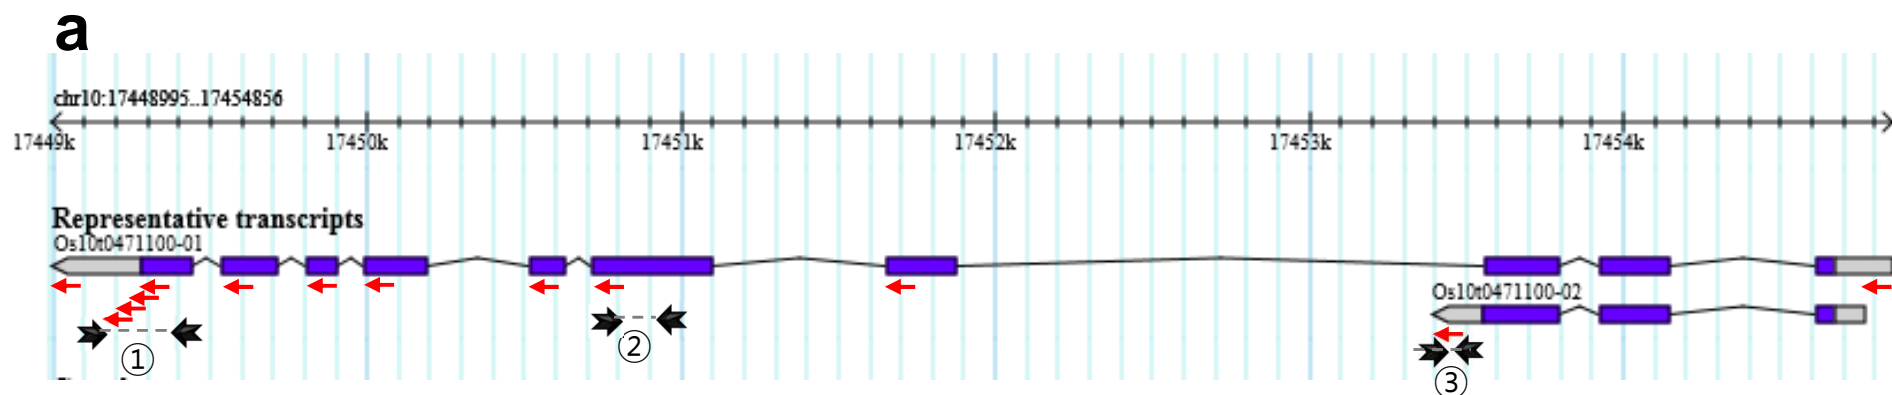

**b**

| SEQ_ID (ASDM)        | Leaf | Root | P1cm   | S21DAP | CV  | SEQ_ID (RNA-Seq)     | Leaf | Root | P1cm | Seed | CV  |
|----------------------|------|------|--------|--------|-----|----------------------|------|------|------|------|-----|
| ① Os10t0471100-01    | 238  | 182  | 32,324 | 1,839  | 1.8 | Os10t0471100-01_E001 | 1    | 0    | 401  | 13   | 1.9 |
| ② Os10t0471100-01_UE | 56   | 54   | 2,606  | 211    | 1.7 | Os10t0471100-02_E008 | 0    | 0    | 244  | 5    | 1.9 |
| ③ Os10t0471100-02    | 44   | 23   | 1,475  | 48     | 1.8 |                      |      |      |      |      |     |

**c**

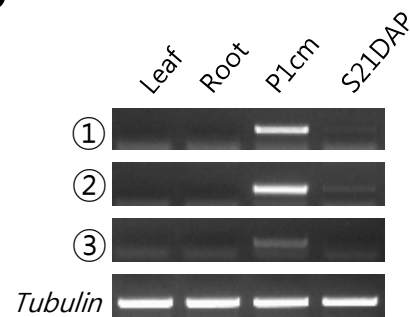

**d**

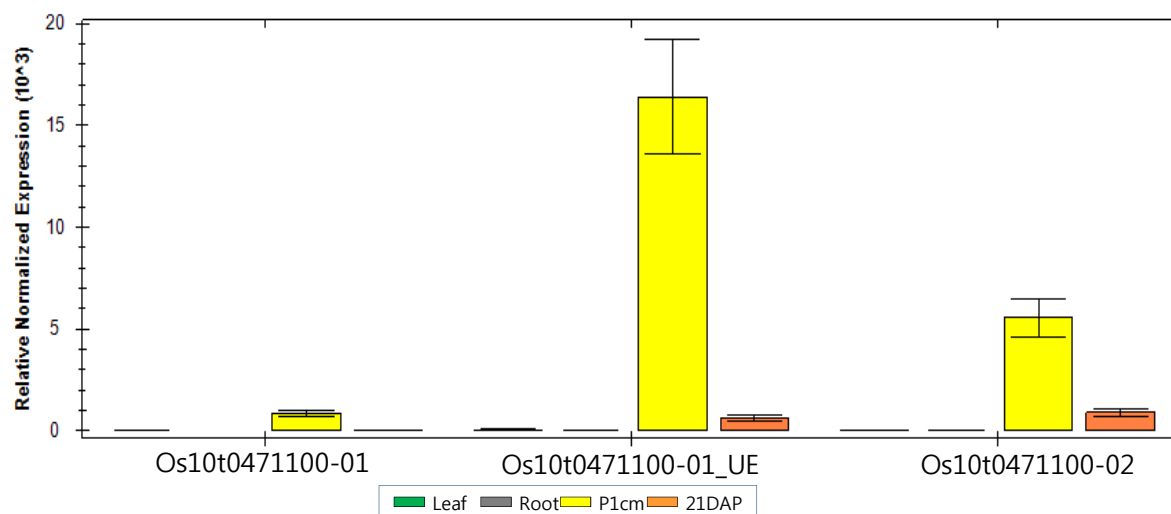

**Fig. S2B. Os10g0471100 was active in the P1cm stage.**

Os10t0471100-01 and Os10t0471100-02 encoded a protein with high similarity to proteins involved in wax production and CER1, respectively. **a** Feature probes and primers for PCR as indicated above. **b** Intensities in ASDM (left) and counts in RNA-Seq (right). **c** Analysis by RT-PCR and **d** quantitative real-time PCR.

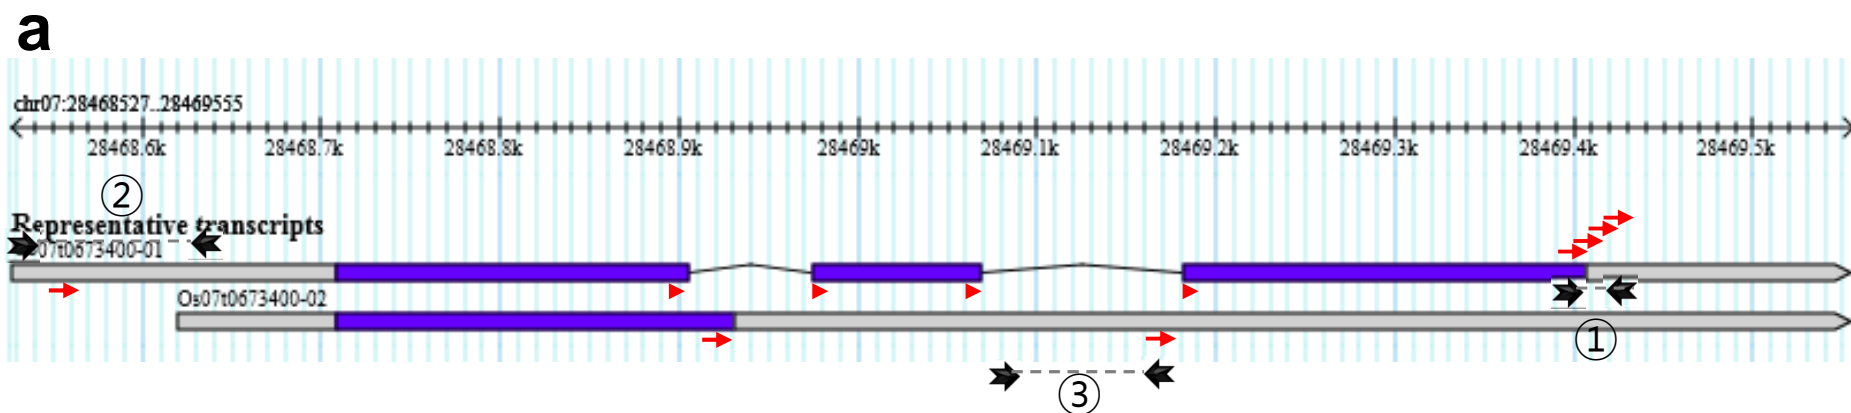

**b**

| SEQ_ID (ASDM)        | Leaf  | Root | P1cm  | S21DAP | CV  | SEQ_ID (RNA-Seq)     | Leaf | Root | P1cm | Seed | CV  |
|----------------------|-------|------|-------|--------|-----|----------------------|------|------|------|------|-----|
| ① Os07t0673400-01    | 1,614 | 228  | 1,377 | 40,940 | 1.8 | Os07t0673400-01_E001 | 16   | 1    | 4    | 14   | 0.8 |
| ② Os07t0673400-01_UE | 419   | 172  | 369   | 3,138  | 1.4 | Os07t0673400-02_E003 | 1    | 0    | 1    | 10   | 1.6 |
| ③ Os07t0673400-02    | 309   | 191  | 176   | 788    | 0.8 |                      |      |      |      |      |     |

**c**

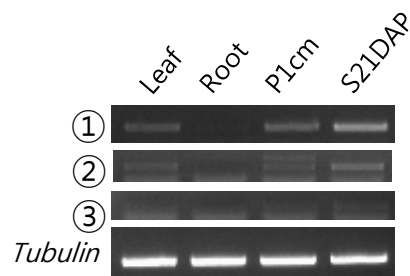

**d**

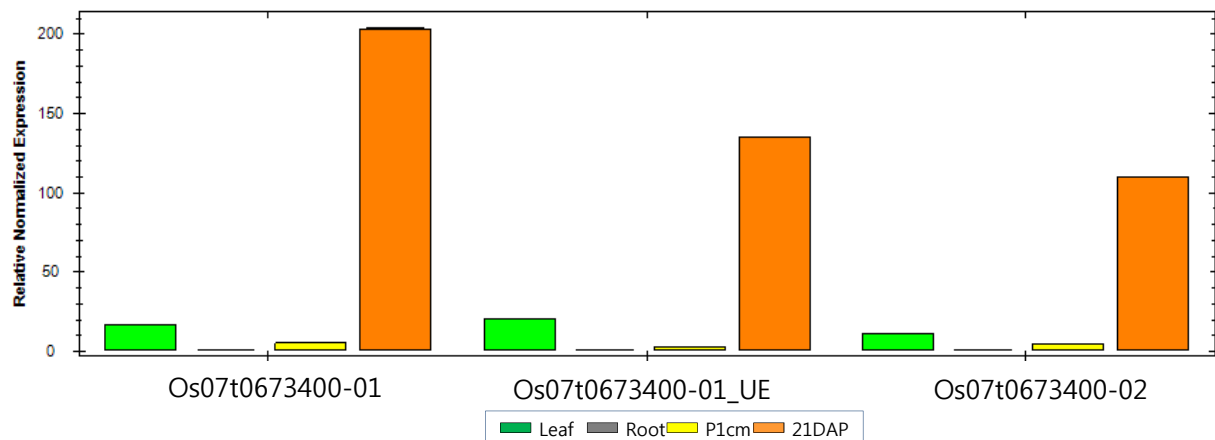

**Fig. S2C. Os07g0673400 was active in the S21DAP stage.**

Os07t0673400-01 and Os07t0673400-02 encoded a protein with high similarity to proteins involved in Rossmann-like alpha/beta/alpha sandwich fold domain containing protein and similar to universal stress protein, respectively. **a** Feature probes and primers for PCR as indicated above. **b** Intensities in ASDM (left) and counts in RNA-Seq (right). **c** Analysis by RT-PCR and **d** quantitative real-time PCR.

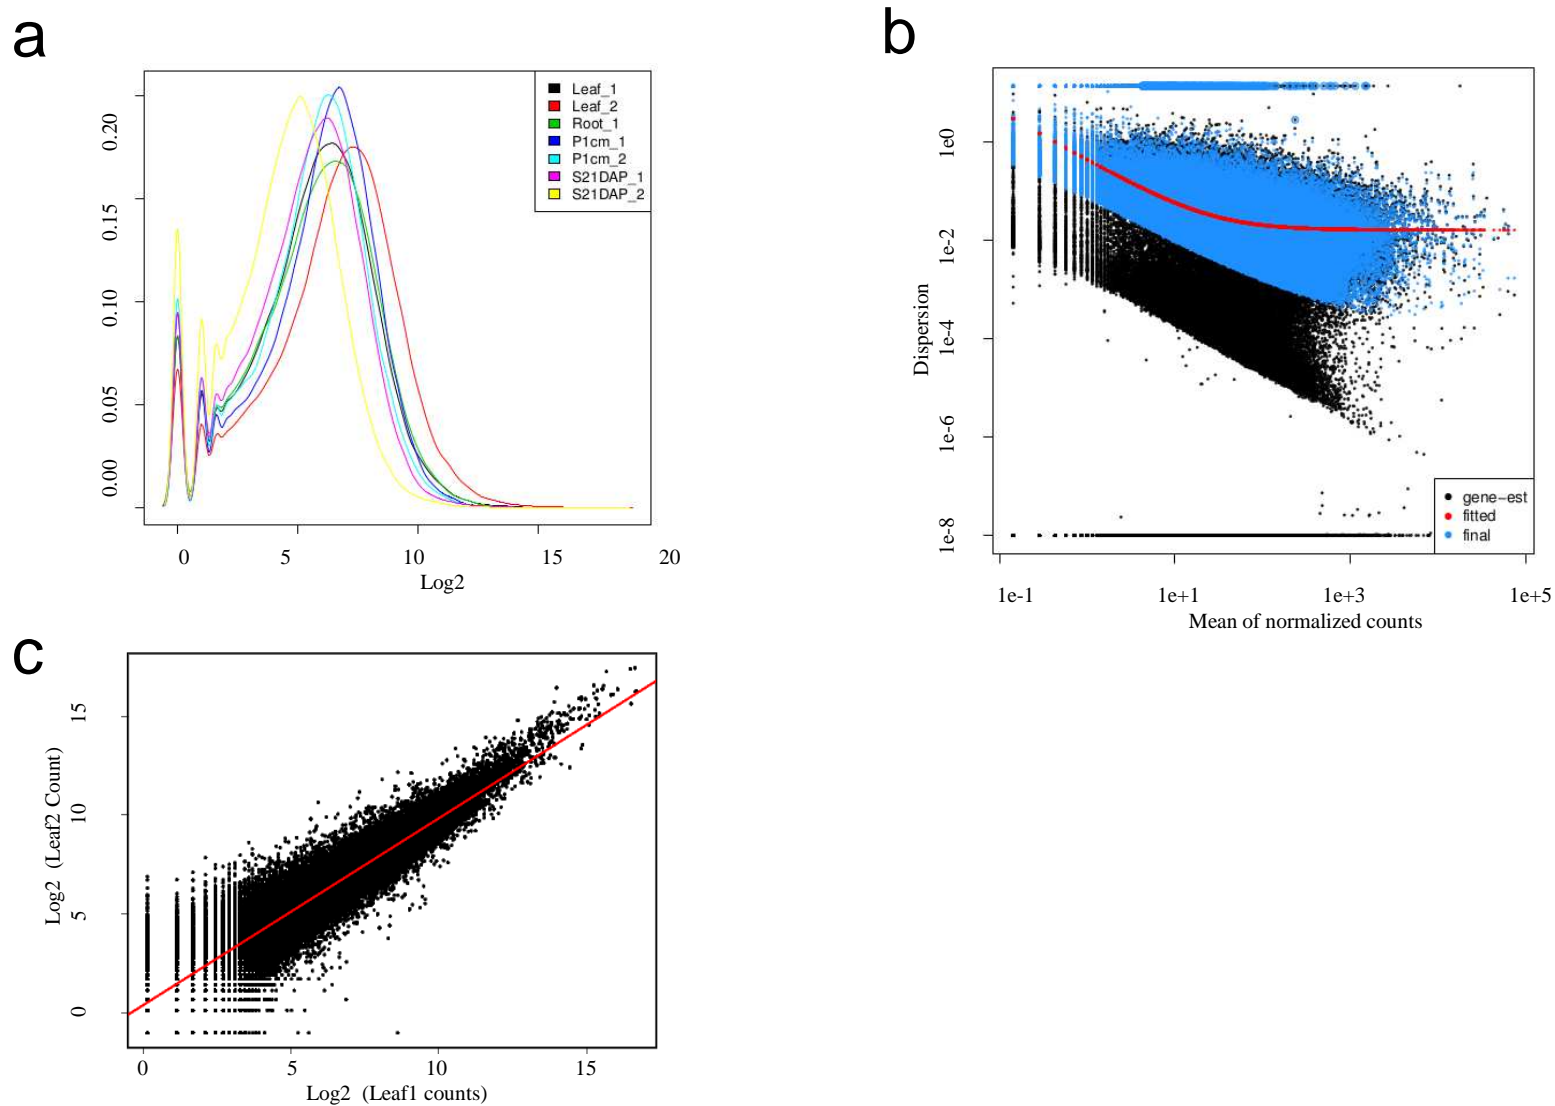

**Fig. S3. Data distribution of raw RNA-Seq. Dispersion of raw (a) and normalized counts (b) and a consistency test between 2 independent RNA-seq using leaf samples (c).**

a, The data was processed with density function of R. b The initial perData set was loaded and normalized with DEXSeqDataSetFromHTSeq and estimateSizeFactors, respectively in DEXSeq package. -exon dispersion estimates (shown by black points), the fitted mean-dispersion values function (red line), and the shrunken values in blue. c Log<sub>2</sub>-based intensities of 2 leaf samples were compared. The linear model was  $y=0.943x + 0.404$ ,  $r^2 = 0.889$ .

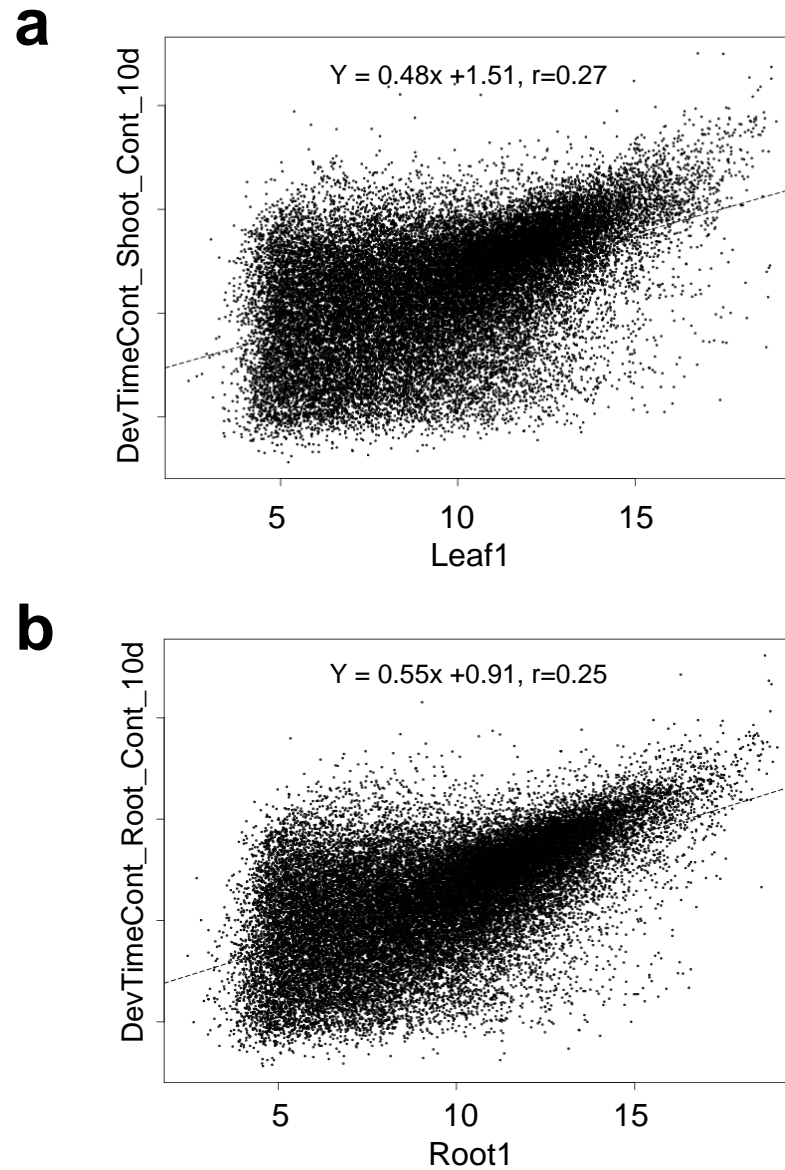

**Fig. S4.** Data comparison between the intensities of ASDM and the counts of RNA-seq in a public database, TENOR (<http://tenor.dna.affrc.go.jp>). RNA-Seq data Soot\_Count\_10d and Root\_Coun\_10d were obtained from the TENOR database. The values are represented in x- and y-axes, respectively. The linear regression model gave slopes of 0.48 and 0.55 for the leaf (a) and root (b), respectively. Pearson correlation coefficients ranged 0.25-0.27.

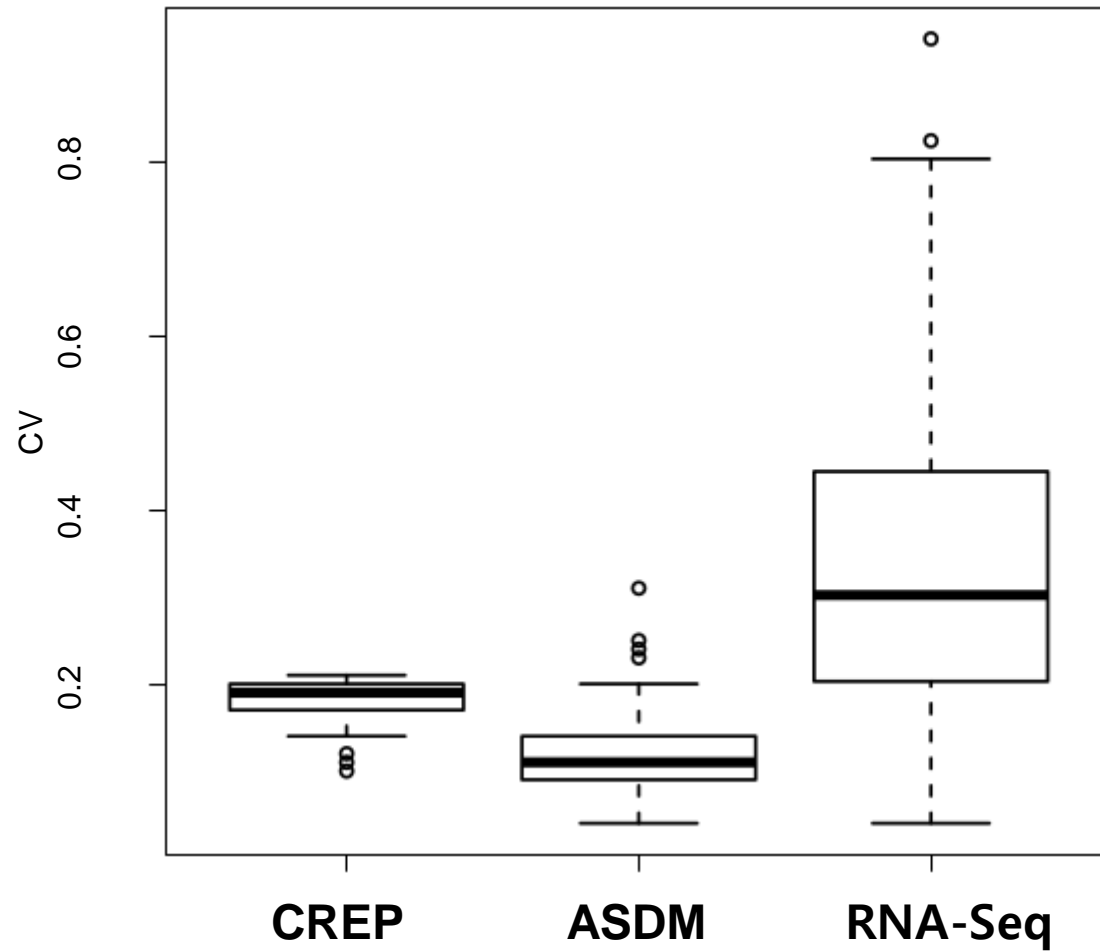

**Fig. S5.** The distribution of CVs of 100 constitutively expressed genes in CREP (mean = 0.18, sd 0.02) and their corresponding genes in ASDM (mean = 0.11, sd 0.05) and RNA-Seq (mean = 0.34, sd 0.19) datasets. The gene list was obtained from reported in Wang et al. (2010) and the values in the ASDM and RNA-Seq are retrieved in table S8 in this report.

**a**

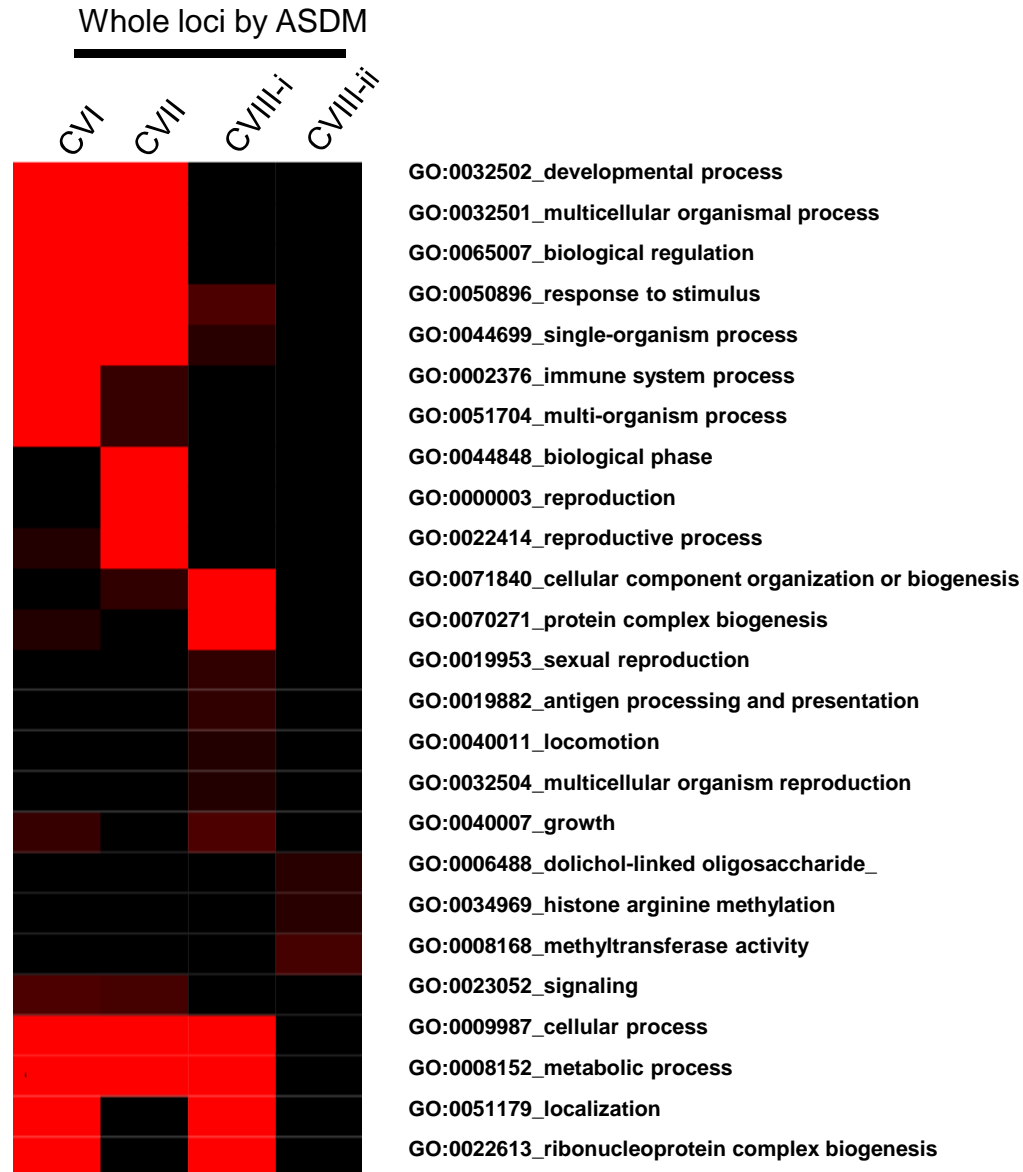



**b**

## Single ts loci

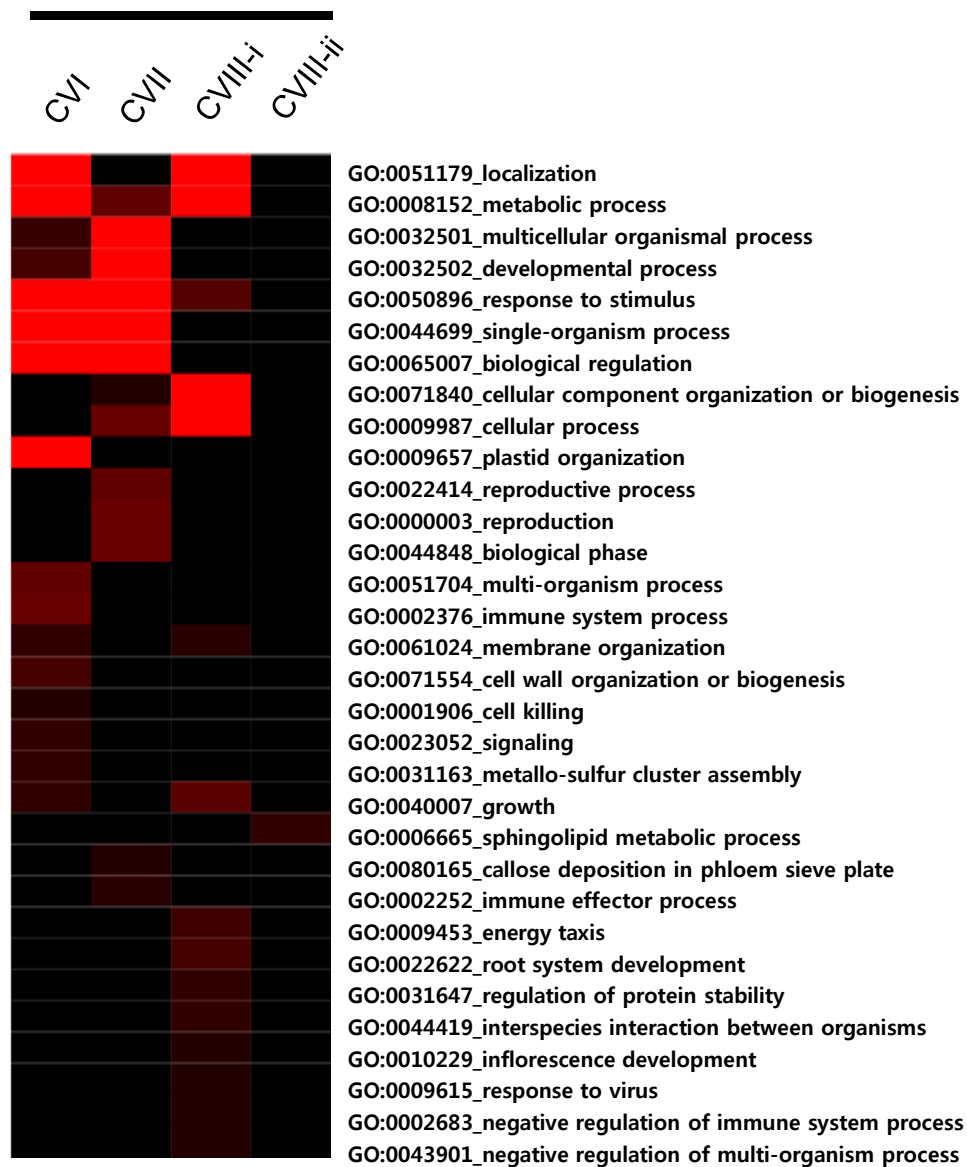

## Alternatively spliced ts loci

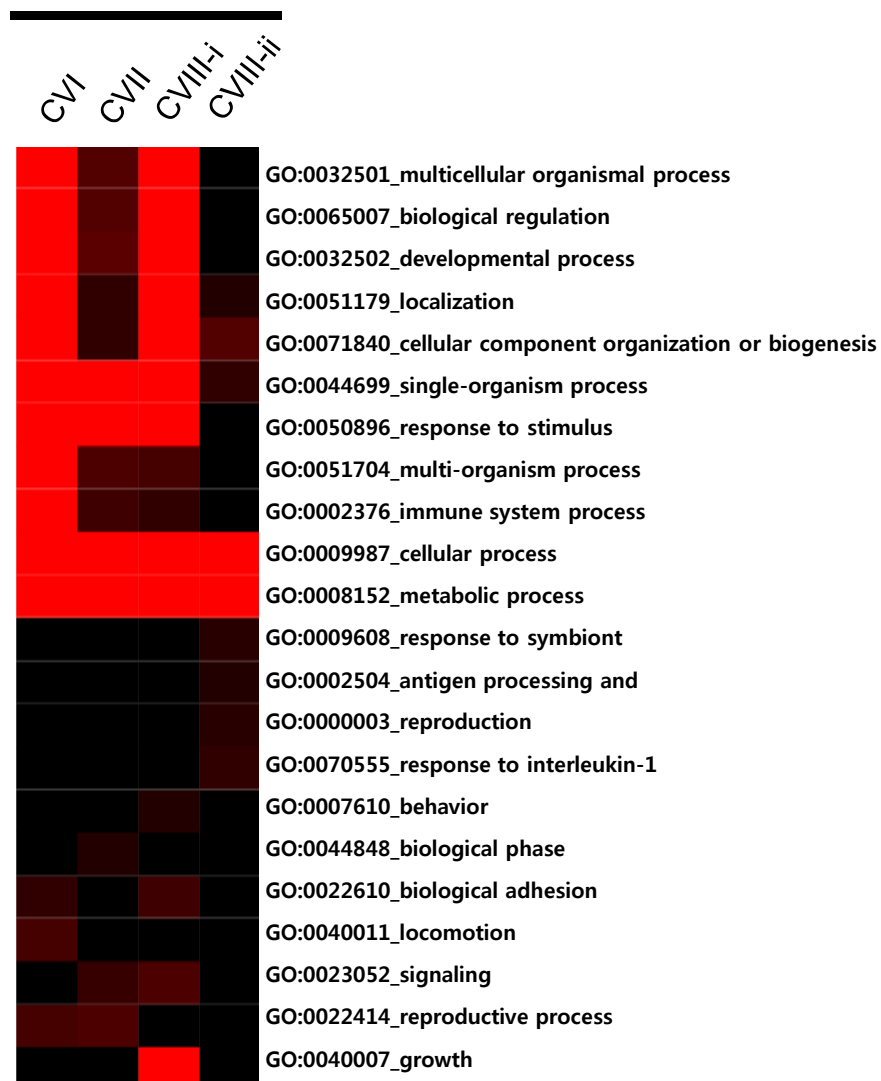

**C****Whole loci by RNA-Seq**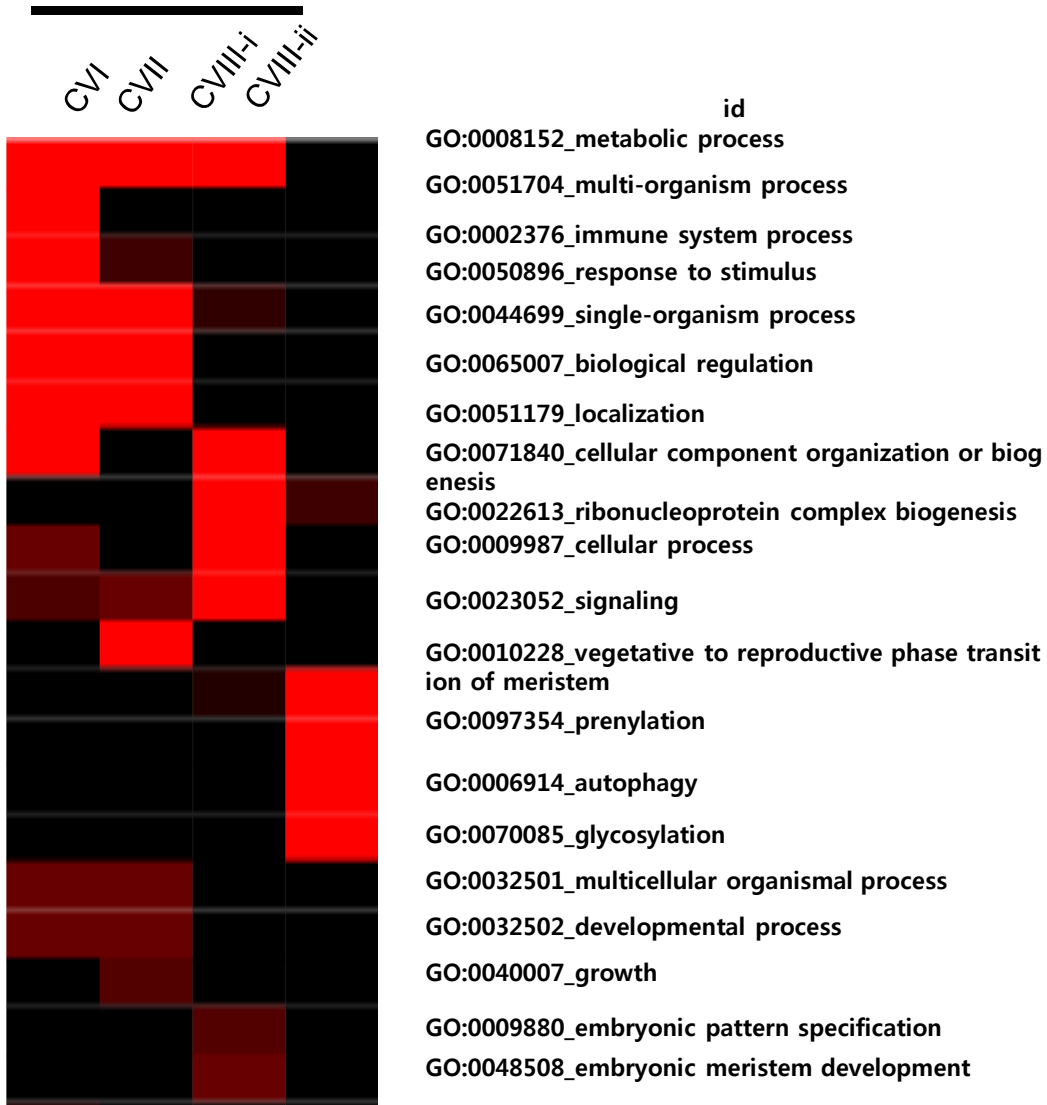

**Fig. S6.** GO analysis of loci of whole genes **(a)** and the genes with single loci **(b, left)** or alternatively spliced transcripts **(b, right)** loci between CVI, CVII, CVIII-i and CVIII-ii based on ASDM. GO analysis of loci of whole genes by RNA-Seq is presented in **(c)**. As the expression of the genes in CVIII-iii is very low, the group is disregarded. GO terms that are enriched in CVI and CVII are GO:0032502\_developmental process, GO:0032501\_multicellular organismal process, GO:0065007\_biological regulation, GO:0050896\_response to stimulus, GO:0044699\_single-organism process, GO:0009987\_cellular process and GO:0008152\_metabolic process are also enriched in CVIII-i. GO terms that are enriched in CVII are GO:0044848\_biological phase, GO:0000003\_reproduction, GO:0022414\_reproductive process. GO terms that are enriched in CVIII-i are GO:0019953\_sexual reproduction, GO:0019882\_antigen processing and presentation, GO:0040011\_locomotion, GO:0032504\_multicellular organism reproduction, GO:0040007\_growth. GO analysis of loci of single transcript loci **(b, left)** and alternatively spliced transcript loci **(b, right)** between CVI, CVII, CVIII-i and CVIII-ii. Next we tested GO enrichments of CV groups are affected by the loci with single or alternative spliced transcripts. The number of loci with single and alternative spliced transcripts are 16,999 and 5844, respectively. The number of loci with single transcript (16,999) are 4,172, 4,607, 3,154, 5,056 according to the groups of CVI, CVII, CVIII-I, and CVIII-ii, respectively. For these genes, GO enrichments are tested. GO:0009657\_plastid organization is highly enriched by single transcript in CVI. GO terms that are moderately enriched by single transcript in CVI are GO:0051704\_multi-organism process, GO:0002376\_immune system process, GO:0061024\_membrane organization, GO:0071554\_cell wall organization or biogenesis, GO:0001906\_cell killing, GO:0023052\_signaling, GO:0031163\_metallo-sulfur cluster assembly, GO:0040007\_growth. GO terms that are moderately enriched by single transcript in CVII are GO:0009987\_cellular process, GO:0000003\_reproduction, GO:0044848\_biological phase, GO:0080165\_callose deposition in phloem sieve plate, GO:0002252\_immune effector process. GO terms that are enriched by genes with single transcript in CVI and CVII are GO:0032501\_multicellular organismal process, GO:0032502\_developmental process, GO:0050896\_response to stimulus, GO:0044699\_single-organism process, GO:0065007\_biological regulation. GO terms that are moderately enriched by single transcript in CVIII-i are GO:0009453\_energy taxis, GO:0022622\_root system development, GO:0031647\_regulation of protein stability, GO:0044419\_interspecies interaction between organisms, GO:0010229\_inflorescence development, GO:0009615\_response to virus, GO:0002683\_negative regulation of immune system process, GO:0043901\_negative regulation of multi-organism process. The number of loci with alternatively spliced transcripts (5844) are 690, 1276, 1632, 2246 according to the groups of CVI, CVII, CVIII-i, and CVIII-ii, respectively. In general the GO enrichment by the loci with alternative spliced transcripts are in agreement with those of the loci with single transcript. An exception is GO:0040007\_growth. The term is highly enriched in this group while that of loci with single transcript is enriched a little bit. For these genes, GO enrichments are tested. GO terms are enriched by CVI, CVII, CVIII-i are GO:0032501\_multicellular organismal process, GO:0065007\_biological regulation, GO:0032502\_developmental process, GO:0051179\_localization, GO:0071840\_cellular component organization or biogenesis, GO:0044699\_single-organism process, GO:0050896\_response to stimulus, GO:0051704\_multi-organism process, GO:0002376\_immune system process, GO:0009987\_cellular process, GO:0008152\_metabolic process. GO:0040011\_locomotion, GO:0044848\_biological phase, GO:0007610\_behavior are moderately enriched in CVI, CVII, CVIII-I, respectively. **c** GO analysis of loci of whole genes between CVI, CVII, CVIII-i and CVIII-ii based on RNA-Seq dataset. In the analysis, 47 GO terms are enriched by RNA-Seq while 25 terms are by ASDM. Generally speaking, many terms are overlapped in both analyses such as GO:0032501\_multicellular organismal process, GO:0065007\_biological regulation, GO:0050896\_response to stimulus, and GO:0009987\_cellular process. Among 20 highly enriched processes by RNA-Seq 14 terms are found in ASDM. GO terms that are enriched in CVI and CVII are GO:0008152\_metabolic process, GO:0050896\_response to stimulus, GO:0044699\_single-organism process, GO:0065007\_biological regulation. GO:0071840\_cellular component organization or biogenesis, GO:0022613\_ribonucleoprotein complex biogenesis, GO:0009987\_cellular process are also enriched in CVIII-i. GO:0010228\_vegetative to reproductive phase transition of meristem GO:0097354\_prenylation GO:0006914\_autophagy GO:0070085\_glycosylation are also enriched in CVIII-ii.

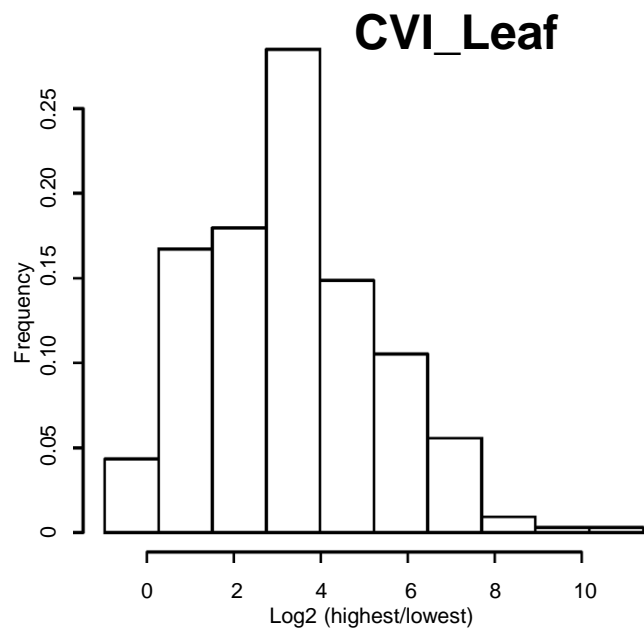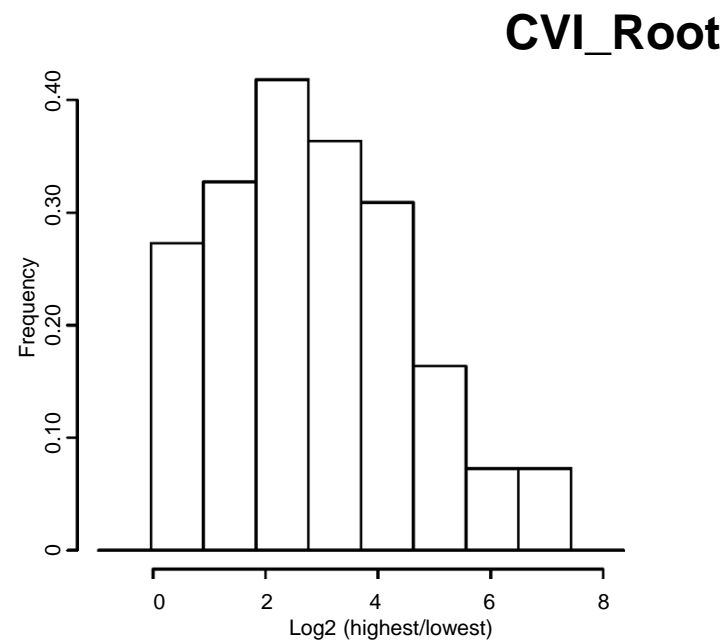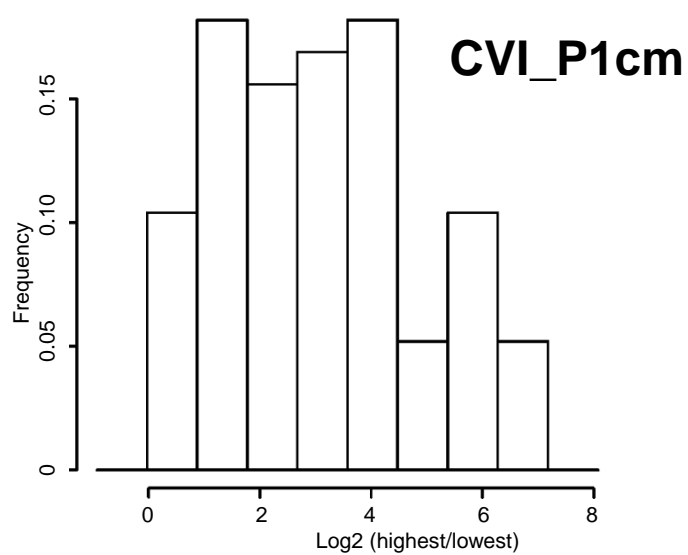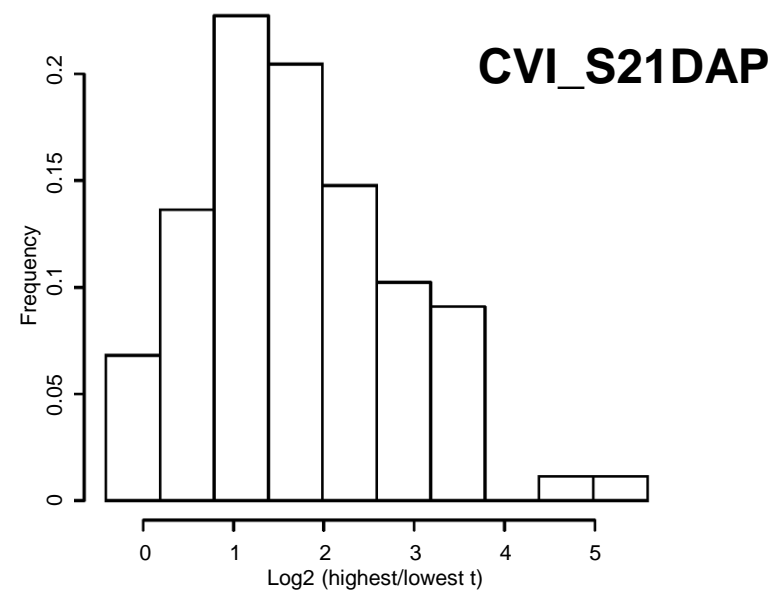

**Fig. S7.** Distribution of the highest and the lowest expression among alternatively spliced transcripts of the CVI: CVI\_Leaf (f=323, mean=3.3, 9.9-fold, sd=1.9), CVI\_Root (f=110, mean=2.9, 7.4- fold, sd=1.7), CVI\_P1cm (f=78, mean=3.1, 8.5- fold, sd=1.8), and S21DAP (f=88, mean=3.4, 10.8- fold, sd=2.2).

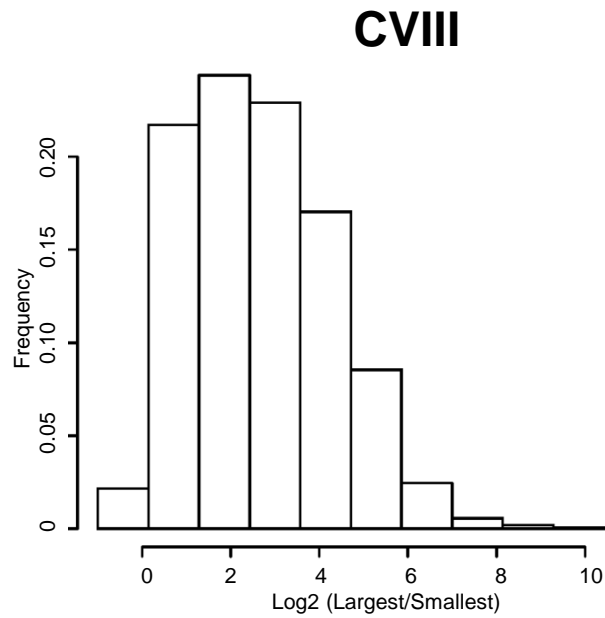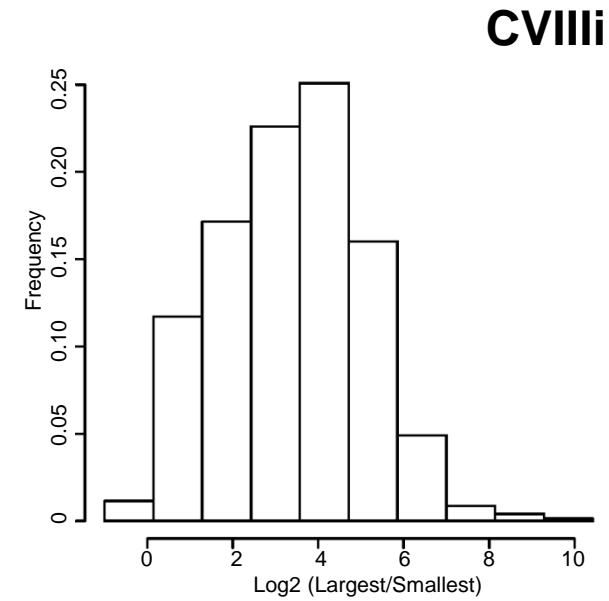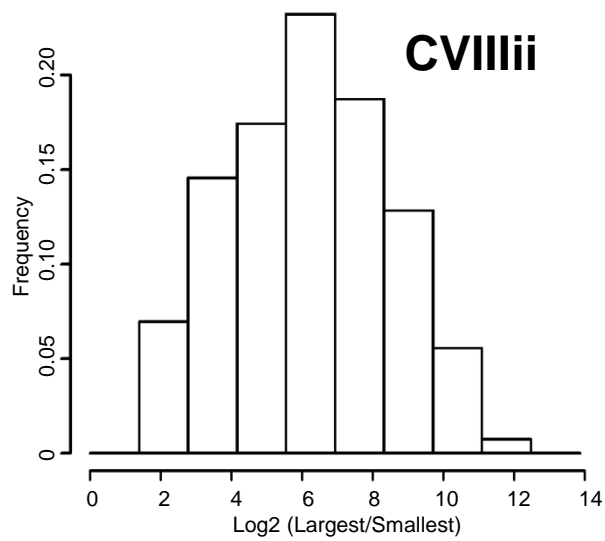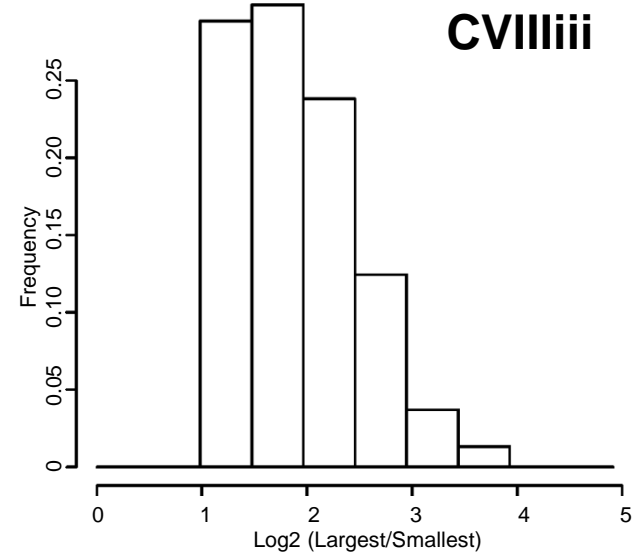

**Fig. S8.** Distribution of the highest and the lowest expression among alternatively spliced transcripts of the CVIII: CVIII (f=3382, mean=2.7, 6.3- fold, sd=1.6), CVIIIi (f=1488, mean=3.4, 10.5- fold, sd=1.7), CVIIIii (f=1244, mean=2.1, 4.3- fold, sd=1.1) and CVIIIiii (f=379, mean=0.9, 1.9- fold, sd=0.6)

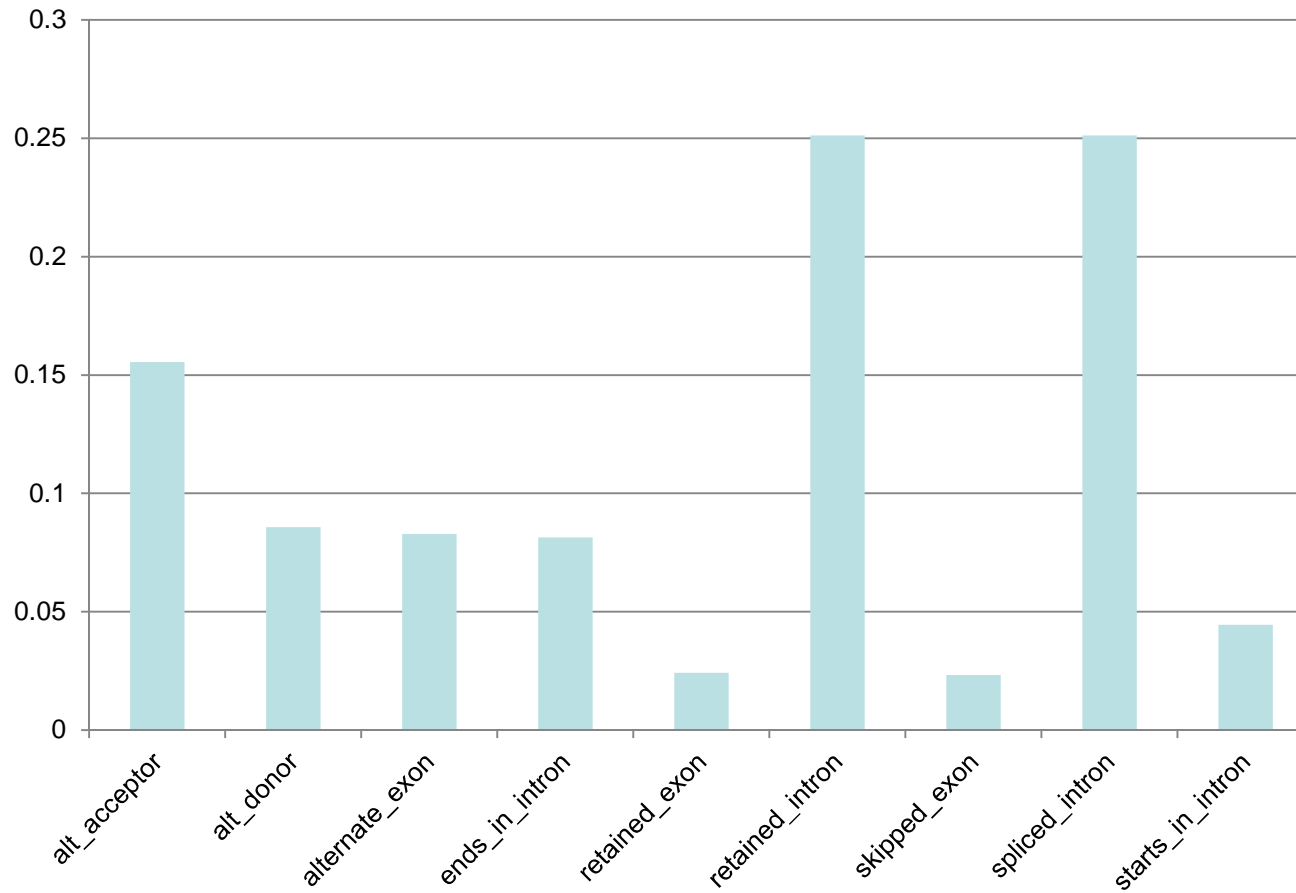

**Fig. S9.** Types of alternative splicing which affect the expression. Types are denoted as in Table S8 Campbell et al. classified the type of alternative splicing into 9 groups base on the results of the Program to Assemble Spliced Alignments (PASA, Campbell et al., 2006); Alternate Acceptor (AA), Alternate Donor (AD), Alternate Terminal Exon (ATE), Retained Exon and Skipped Exon (RE/SE), Initiation within an Intron (IWI), Termination within an Intron (TWI), and Spliced Intron and Retained Intron (RI/SI). PASA detected 5,028 alternative splicing from 2,438 loci .
